# Supplementary material
Source: publisher figshare collection journal article supplement (https://acs.figshare.com/ndownloader/files/5826894)
Supplement: Supplementary file 1 [file 5826894]

**REVISED**  
5/9 **$\alpha,\beta$ -Epoxy Vinyl Triflates in Pd-Catalyzed Reactions**

Kana Yamamoto and Clayton H. Heathcock\*

*Department of Chemistry, University of California, Berkeley, California 94720***Supporting Information**

Experimental procedures for all the new compounds and known compounds without published experimental procedures are described below. Compounds that are not presented in the main text are numbered starting from S1.

Epoxide **2a** was prepared from the commercially available steroid, as shown below. Dissolving metal reduction of hecogenin<sup>1,2</sup> followed by acylation provided rockogenin diacetate (**S2**). This was transformed into enone **S3** by a slight modification<sup>4</sup> of Dauben's procedure<sup>5</sup> ("Marker degradation").<sup>6</sup> Treatment of **S3** with H<sub>2</sub>O<sub>2</sub> and NaOH in refluxing MeOH epoxidized the enone and cleaved the acetates, giving diol **S4**. TBS protection of this diol afforded **2a** in 7 steps, 42 % overall yield.

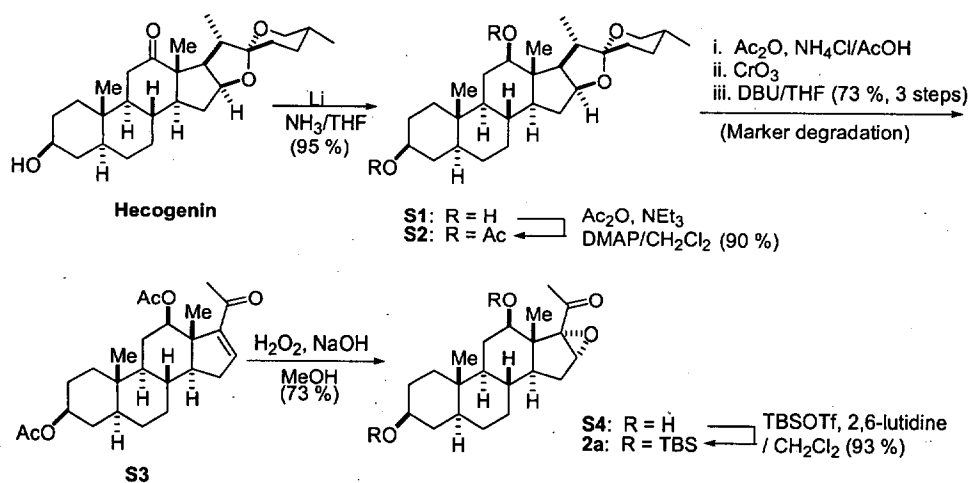**Experimental Section**

**General.** All moisture- or air-sensitive reactions were performed under N<sub>2</sub> or Ar atmosphere in flame-dried glassware. Unless otherwise noted, extracts were dried with anhydrous MgSO<sub>4</sub> and concentrated using a rotary evaporator at aspirator pressure.

<sup>1</sup> Huffman, J. W.; Alabran, D. M.; Bethea, T. W. *J. Am. Chem. Soc.* **1962**, *27*, 3381.

<sup>2</sup> Isolation of rockogenin by recrystallization removed impurities presented in the starting material. Essentially no C12  $\alpha$ -isomer was seen by this procedure.

<sup>3</sup> This enone was previously made by a similar procedure. Kim, S.; Sutton, S. C.; Guo, C.; LaCour, T. G.; Fuchs, P. L. *J. Am. Chem. Soc.* **1999**, *121*, 2056-2070.

<sup>4</sup> Kemp, S. J. *Ph. D. Thesis, University of California, Berkeley* **1995**.

<sup>5</sup> Dauben, W. G.; Fonken, G. J. *J. Am. Chem. Soc.* **1954**, *76*, 4618.

Purification on silica refers to "flash chromatography" was performed according to the method of Still.<sup>7</sup> Unless other wise noted, Merck silica gel (230-400 mesh) was used as the stationary phase. Fischer basic Al<sub>2</sub>O<sub>3</sub> (activity 1, 60-325 mesh) was used where noted. The term "deactivated silica" refers to silica gel, which is pre-treated with 1% NEt<sub>3</sub>/hexanes for at least 30 min and washed with hexanes prior to use.

Solvents used in moisture-sensitive reactions were dried using standard methods. THF was degassed when necessary by passing a stream of Ar through it for at least 30 minutes.

Unless otherwise specified, all the reagents and starting materials were used as obtained from commercial suppliers. Bu<sub>3</sub>SnH was distilled and stored under either N<sub>2</sub> or Ar. LiCl was dried by keeping at 140 °C under high vacuum (< 0.5 mm Hg) for at least 12 h when needed.

Unless otherwise indicated, IR spectra were recorded on Gemini FTIR instruments from thin films on NaCl plates. <sup>1</sup>H NMR spectra were obtained with Bruker spectrometers at 400 or 500 MHz. Spectra chemical shifts are calibrated to the residual protio solvent resonance (CDCl<sub>3</sub>, δ 7.25). <sup>1</sup>H NMR data are described in the following order: chemical shifts, multiplicity [s (singlet), d (doublet), t (triplet), q (quartet), m (multiplet), and br (broad)], integration, and coupling constant(s). <sup>13</sup>C spectra were obtained with Bruker instruments at 100 or 125 MHz. Spectra chemical shifts are calibrated to the solvent resonance (CDCl<sub>3</sub>, δ 77.0). Distortionless enhancement by polarization transfer (DEPT) was routinely conducted to assist with signal assignments. Mass spectra were recorded at U.C. Berkeley using fast atom bombardment (FAB). All the melting points are uncorrected. Elemental analyses were performed at the University of California, Berkeley microanalysis facility.

**(25R)-5α-Spirostane-3β,12β-diol (rockogenin)<sup>8</sup> (S1).** A solution of hecogenin (21.4 g, 49.5 mmol) in THF (300 mL) was added to a stirring solution of liquid NH<sub>3</sub> (1 L) and THF (500 mL) at -78 °C. Li metal (4.5 g) was added in small pieces and the solution was stirred vigorously until it turned dark blue. Another portion of THF (400 mL) was added and the solution was stirred for 1 h at -78 °C and then for 4 h at -33 °C. The reaction was then quenched with NH<sub>4</sub>Cl (10 g) and NH<sub>3</sub> was allowed to evaporate. Water (200 mL) was carefully

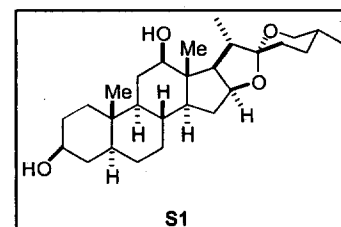

<sup>6</sup> (a) Marker, R. E.; Wagner, R. B.; Ulshafer, P. R.; Wittbecker, E. L.; Goldsmith, D.; Ruof, C. *J. Am. Chem. Soc.* **1947**, *69*, 2167. (b) Cameron, A. F. B.; Evans, R. M.; Hamlet, J. C.; Hunt, J. C.; Jones, P. G. *J. Chem. Soc.* **1955**, 2807.

<sup>7</sup> Still, W. C.; Kahn, M.; Mitra, A. *J. Org. Chem.* **1978**, *43*, 2923.

<sup>8</sup> Huffman, J. W.; Alabran, D. M.; Bethea, T. W. *J. Am. Chem. Soc.* **1962**, *27*, 3381.

added while cooling in an ice bath, and the solution was concentrated to ~400 mL. To the white suspension was added  $\text{CH}_2\text{Cl}_2$  (300 mL), and the aqueous layer was extracted with  $\text{CH}_2\text{Cl}_2$  (100 mL x 3). The combined organic layers were washed with 1 M HCl (200 mL), saturated  $\text{NaHCO}_3$  (200 mL) and brine (200 mL) to give diol **S1** as a white solid. Recrystallization from EtOAc/hexanes gave white flakes (15.6 g, 35.9 mmol, 73 %). The mother liquor was flash chromatographed (30 % EtOAc/hexanes) to give additional diol **S1** (4.65 g, 10.7 mmol, 22 %):  $R_f$  0.18 (50% EtOAc/hexanes). mp 202-203 °C.  $^1\text{H}$  NMR (500 MHz)  $\delta$  4.40 (q, 1,  $J = 7.5$ ), 3.57 (sept, 1,  $J = 5.0$ ), 3.46 (m, 1), 3.36 (dd, 1,  $J = 10.9$ ), 3.30 (m, 1), 2.00 (m, 1), 1.9-0.7 (m, 27), 1.02 (d, 3,  $J = 6.81$ ), 0.821 (s, 3), 0.779 (d, 3,  $J = 6.34$ ), 0.748 (s, 3).  $^{13}\text{C}\{^1\text{H}\}$  NMR (100 MHz)  $\delta$  109.4 (C), 80.7 (CH), 79.8 (CH), 71.1 (CH), 66.8 ( $\text{CH}_2$ ), 61.7 (CH), 54.7 (CH), 53.3 (CH), 46.0 (CH), 44.8 (C), 42.1 (CH), 38.0 (CH), 31.8 ( $\text{CH}_2$ ), 31.4 ( $\text{CH}_2$ ), 31.2 ( $\text{CH}_2$ ), 30.5 ( $\text{CH}_2$ ), 30.2 (CH), 28.8 ( $\text{CH}_2$ ), 28.5 ( $\text{CH}_2$ ), 17.1 ( $\text{CH}_3$ ), 13.9 ( $\text{CH}_3$ ), 12.3 ( $\text{CH}_3$ ), 10.5 ( $\text{CH}_3$ ). IR (thin film) 3410.  $[\alpha]_D -55.3$  ( $c = 1.29$ ,  $\text{CH}_2\text{Cl}_2$ ). Anal. Calcd for  $\text{C}_{27}\text{H}_{45}\text{O}_4$ : C, 68.69; H, 10.48. Found: C, 68.67; H, 10.53.

**(25R)-3 $\beta$ ,12 $\beta$ ,-Diacetoxy-5 $\alpha$ -Spirostane (rockogenin diacetate) (**S2**).**

The solution of **S1** (9.02 g, 20.8 mmol),  $\text{Ac}_2\text{O}$  (4.8 mL, 5.1 g, 50 mmol),  $\text{NEt}_3$  (14 mL, 10 g, 100 mmol) and DMAP (1 spatula) in  $\text{CH}_2\text{Cl}_2$  (80 mL) was stirred for 5.5 h. The reaction solution was poured into water (200 mL) and extracted with  $\text{CH}_2\text{Cl}_2$  (50 mL x 3). The combined layers were washed with saturated  $\text{NaHCO}_3$  (200 mL),

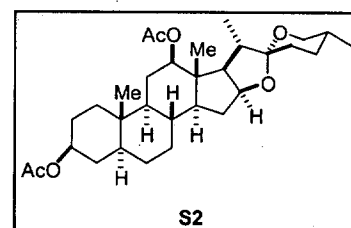

1M HCl (200 mL), brine (200 mL), dried, and concentrated to give the crude diacetate **S2**. The residue was flash chromatographed (30% EtOAc/hexanes) to give enone **S3** (9.64 g, 18.6 mmol, 90 %) as a white solid. An analytical sample was obtained by recrystallization from MeOH as white needles, mp 207-208 °C (lit.<sup>9</sup> 206-209 °C).  $R_f$  0.42 (20% EtOAc/hexanes).  $^1\text{H}$  NMR (400 MHz)  $\delta$  4.61 (sept, 1,  $J = 5.60$ ), 4.48 (dd, 1,  $J = 4.50$ , 11.1), 4.34 (q, 1,  $J = 7.20$ ), 3.40 (m, 1), 3.28 (dd, 1,  $J = 10.9$ ), 1.97 (s, 3), 1.95 (s, 3), 1.85-0.8 (m, 28), 0.840 (d, 3,  $J = 6.60$ ), 0.794 (s, 3), 0.787 (s, 3), 0.730 (d, 3,  $J = 6.20$ ).  $^{13}\text{C}\{^1\text{H}\}$  NMR (100 MHz)  $\delta$  170.6 (C), 170.4 (C), 109.2 (C), 81.6 (CH), 80.5 (CH), 73.4 (CH), 66.8 ( $\text{CH}_2$ ), 61.2 (CH), 44.5 (C), 42.1 (CH), 36.5 ( $\text{CH}_2$ ), 35.6 (C), 34.1 (CH), 33.8 ( $\text{CH}_2$ ), 31.6 ( $\text{CH}_2$ ), 31.4 ( $\text{CH}_2$ ), 31.1 ( $\text{CH}_2$ ), 30.2 (CH), 28.8 ( $\text{CH}_2$ ), 28.3 ( $\text{CH}_2$ ), 27.3 ( $\text{CH}_2$ ), 21.5 (CH), 21.4 (CH), 17.1 ( $\text{CH}_3$ ), 13.6 ( $\text{CH}_3$ ), 12.1 ( $\text{CH}_3$ ), 11.6 ( $\text{CH}_3$ ). IR (thin film) 1737.  $[\alpha]_D -48.9$  ( $c = 1.07$ ,  $\text{CH}_2\text{Cl}_2$ ). Anal. Calcd for  $\text{C}_{31}\text{H}_{48}\text{O}_6$ : C, 72.06; H, 9.36. Found: C, 72.21; H, 9.50.

**3 $\beta$ ,12 $\beta$ -Diacetoxy-5 $\alpha$ -pregn-14-en-20-one (S3).** A mixture of S2 (10.3 g, 20.0 mmol), Ac<sub>2</sub>O (40 mL), pyridine (1.6 mL, 20 mmol) and NH<sub>4</sub>Cl (1.04 g, 20 mmol) was heated at 130 °C for 18 h. The reaction was then cooled and concentrated under high vacuum to remove excess of Ac<sub>2</sub>O. The brown residue was then dissolved in AcOH (90 mL) and CH<sub>2</sub>Cl<sub>2</sub> (50 mL) and cooled to 0 °C. To this stirring solution was added CrO<sub>3</sub> solution (1.4 M in 9:1 AcOH/H<sub>2</sub>O, 25 mL, 35 mmol) over 10 min. After stirring for 15 min, *i*-PrOH (40 mL) was added and the ice bath was removed. EtOAc (300 mL) and hexanes (150 mL) were added and the organic layer was washed with brine (75 mL), dried and concentrated. The resulting green solid was dissolved in CH<sub>2</sub>Cl<sub>2</sub> (100 mL), DBU (6 mL, 40 mmol) was added and heated to reflux for 4 h. The solution was cooled and concentrated to brown viscous oil. This oil was flash chromatographed (20%→30% EtOAc/hexanes) to give enone S3 (6.10 g, 14.7 mmol, 73 %) as a white solid, mp 136.5-137 °C (lit.<sup>10</sup> 138-140 °C). R<sub>f</sub> 0.36 (30% EtOAc/hexanes). <sup>1</sup>H NMR (400 MHz)  $\delta$  6.61 (dd, 1, *J* = 1.78, 3.29), 5.00 (dd, 1, *J* = 5.21, 11.6), 4.66 (sept, 1, *J* = 5.07), 2.29 (ddd, 1, *J* = 3.39, 6.59, 17.1), 2.21 (s, 3), 2.2-0.8 (m, 17), 2.09 (s, 3), 2.00 (s, 3), 1.00 (s, 3), 0.848 (s, 3). <sup>13</sup>C{<sup>1</sup>H} NMR (100 MHz)  $\delta$  197.0 (C), 171.1 (C), 170.4 (C), 154.7 (C), 144.1 (CH), 74.6 (CH), 73.2 (CH), 53.7 (CH), 52.9 (CH), 50.8 (C), 44.4 (CH), 36.2 (CH<sub>2</sub>), 35.4 (C), 35.1 (C), 33.6 (CH<sub>2</sub>), 32.2 (CH), 31.2 (CH<sub>2</sub>), 31.0 (CH<sub>2</sub>), 28.1 (CH<sub>2</sub>), 27.9 (CH<sub>3</sub>), 27.8 (CH<sub>2</sub>), 27.1 (CH<sub>2</sub>), 21.5 (CH<sub>3</sub>), 21.2 (CH<sub>3</sub>), 12.2 (CH<sub>3</sub>), 11.8 (CH<sub>3</sub>). IR (thin film) 1736, 1677. [ $\alpha$ ]<sub>D</sub> +33.3 (*c* = 0.93, CH<sub>2</sub>Cl<sub>2</sub>). Anal. Calcd for C<sub>25</sub>H<sub>36</sub>O<sub>5</sub>: C, 72.08; H, 8.71. Found: C, 71.91; H, 8.71.

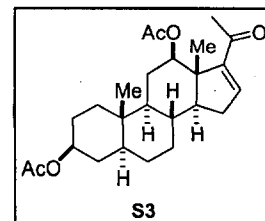

**3 $\beta$ ,12 $\beta$ -Dihydroxy-16 $\alpha$ ,17 $\alpha$ -oxido-5 $\alpha$ -pregn-20-one (S4).** To a solution of S3 (2.5 g, 6.0 mmol) in MeOH (100 mL) was added a suspension of 10% NaOH in MeOH (7.9 mL, 20 mmol). The solution was cooled to 0 °C and H<sub>2</sub>O<sub>2</sub> (30%, 10 mL, 90 mmol) was added dropwise over 10 min. The solution turned bright yellow, which was discharged after stirring at 0 °C for 55 min. The bath was removed and the solution was stirred at reflux for 2 h. After being cooled to rt, the solution was extracted with CH<sub>2</sub>Cl<sub>2</sub> (100 mL, 50 mL  $\times$  2) and the combined organic layers were washed with 1 M Na<sub>2</sub>SO<sub>3</sub> (50 mL) and brine (50 mL). The aqueous layers were combined and back-extracted with CH<sub>2</sub>Cl<sub>2</sub> (20 mL  $\times$  3). The back-extracts were combined with extracts, dried and concentrated to give a white solid (1.9 g).

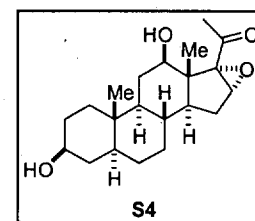

<sup>9</sup> Hirschmann, R.; Snoody Jr., C. S.; Hiskey, C. F.; Wendler, N. L. *J. Am. Chem. Soc.* **1954**, *76*, 4013.

Flash chromatography (30%→40% EtOAc/hexanes) gave epoxide **S4** (1.6 g, 4.58 mmol, 76 %) as a white solid.

The analytical sample was obtained by recrystallization from MeOH as white needles:  $R_f$  0.17 (50%

EtOAc/hexanes). mp 216-217 °C.  $^1\text{H}$  NMR (500 MHz)  $\delta$  4.62 (br s, 1), 3.76 (s, 1), 3.67 (dd, 1,  $J$  = 5.00, 10.7), 3.57 (sept, 1,  $J$  = 4.90), 2.11 (s, 3), 1.98 (dd, 1,  $J$  = 6.43, 13.5), 1.78 (dt, 1,  $J$  = 3.62, 13.3), 1.2-0.7 (m, 15), 0.92 (s, 3), 0.80 (s, 3).  $^{13}\text{C}\{^1\text{H}\}$  NMR (100 MHz)  $\delta$  207.9(C), 71.2 (CH), 71.1 (C), 70.8 (CH), 60.8 (CH), 52.5 (CH), 46.5 (C), 44.6 (CH), 43.3 (CH), 37.7 (CH<sub>2</sub>), 36.5 (CH<sub>2</sub>), 35.3 (C), 31.8 (CH), 31.2 (CH<sub>2</sub>), 30.8 (CH<sub>2</sub>), 29.4 (CH<sub>2</sub>), 28.2 (CH<sub>2</sub>), 26.5 (CH<sub>2</sub>), 25.3 (CH<sub>3</sub>), 12.0 (CH<sub>3</sub>), 10.4 (CH<sub>3</sub>). IR (thin film) 3450, 3420, 1688.  $[\alpha]_D^{25} +82.5$  ( $c$  = 1.07, CH<sub>2</sub>Cl<sub>2</sub>). Anal. Calcd for C<sub>21</sub>H<sub>32</sub>O<sub>4</sub>: C, 72.38; H, 9.30. Found: C, 72.25; H, 9.70.

**3 $\beta$ ,12 $\beta$ -Di(*t*-Butyldimethylsilyloxy)-16 $\alpha$ ,17 $\alpha$ -oxido-5 $\alpha$ -pregn-20-one (**2a**).**

To a solution of **S4** (348 mg, 1.00 mmol) in CH<sub>2</sub>Cl<sub>2</sub> (4 mL) was added 2,6-lutidine (321 mg, 349  $\mu$ L, 3.00 mmol, stored over KOH) and cooled to 0 °C. To this was added TBSOTf (628 mg, 528  $\mu$ L, 2.30 mmol) dropwise over 10 min and the solution was

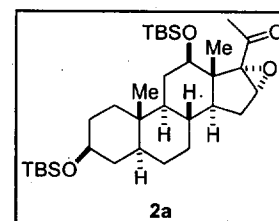

stirred at 0 °C for 1.5 h and at rt for 20 h. The solution was diluted with CH<sub>2</sub>Cl<sub>2</sub> (30 mL), washed with NaHCO<sub>3</sub> (20 mL), 0.25 M HCl (20 mL), brine (20 mL), dried, concentrated and flash chromatographed (10% EtOAc/hexanes) to give **2a** (542 mg, 0.929 mmol, 94%) as a white solid. The analytical sample was obtained by recrystallization from MeOH as white needles, mp 123-124 °C.  $R_f$  0.65 (30% EtOAc/hexanes).  $^1\text{H}$  NMR (500 MHz)  $\delta$  3.68 (dd, 1,  $J$  = 4.80, 10.7), 3.52 (sept, 1,  $J$  = 4.99), 2.07 (s, 3), 1.92 (dd, 1,  $J$  = 6.3, 13.4), 1.7-0.6 (m, 18), 1.10 (s, 3), 0.86 (s, 9), 0.85 (s, 9), 0.79 (s, 3), 0.02 (s, 6), 0.002 (s, 3), -0.02 (s, 3).  $^{13}\text{C}\{^1\text{H}\}$  NMR (100 MHz)  $\delta$  204.0 (C), 73.5 (CH), 71.7 (CH), 70.4 (C), 60.1 (CH), 53.5 (CH), 49.8 (C), 44.9 (CH), 44.2 (CH), 38.3 (CH<sub>2</sub>), 36.7 (CH<sub>2</sub>), 35.4 (C), 31.9 (CH), 31.7 (CH<sub>2</sub>), 31.4 (CH<sub>2</sub>), 30.8 (CH<sub>2</sub>), 28.5 (CH<sub>2</sub>), 27.8 (CH<sub>3</sub>), 27.3 (CH<sub>2</sub>), 25.8 (CH<sub>3</sub>), 25.6 (C), 18.0 (C), 17.9 (C), 12.1 (CH<sub>3</sub>), 10.8 (CH<sub>3</sub>), -3.06 (CH<sub>3</sub>), -3.85 (CH<sub>3</sub>), -4.70 (CH<sub>3</sub>). IR (thin film) 1715.  $[\alpha]_D^{25} +38.7$  ( $c$  = 0.95, CH<sub>2</sub>Cl<sub>2</sub>). Anal. Calcd for C<sub>33</sub>H<sub>60</sub>O<sub>4</sub>Si<sub>2</sub>: C, 68.69; H, 10.48. Found: C, 68.87; H, 10.53.

**3 $\beta$ ,12 $\beta$ -Di(*t*-Butyldimethylsilyloxy)-16 $\alpha$ -17 $\alpha$ -oxido-20-trifluoromethanesulfonyloxy-5 $\alpha$ -pregn-20-ene (**5a**).** To a cold (-78 °C) solution of **2a** (5.1 g, 8.8 mmol)

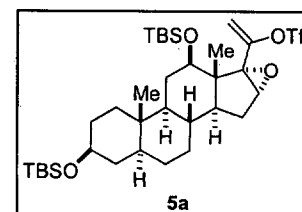

<sup>10</sup> Clegg, A. S.; Denny, W. A.; Jones, s. E. R. H.; Kumar, V.; Meakins, G. D.; Thomas, V. E. *J. Chem. Soc., Perkin. Trans. I* 1972, 492.

and *N*-(4-chloro-2-pyridyl)triflimide<sup>11</sup> (3.8 g, 11 mmol) in THF (35 mL) was added KHMDS (0.5 M in toluene, 21 mL, 11 mmol) dropwise over 70 min and then stirred for 2 h. This was warmed to rt. after the consumption of the starting material, concentrated and flash chromatographed (2.5%→10% EtOAc/hexanes) to give **5a** (5.8 g, 8.2 mmol, 93%) as a white solid. The analytical sample was obtained by recrystallization from MeOH as white fluffy needles: *R*<sub>f</sub> 0.66 (30% EtOAc/hexanes). mp 120-121 °C. <sup>1</sup>H NMR (500 MHz) δ 5.82 (d, 1, *J* = 3.21), 5.32 (d, 1, *J* = 3.21), 3.80 (dd, 1, *J* = 5.10), 3.53 (sept, 1, *J* = 5.10), 3.53 (s, 1), 1.92 (dd, 1, *J* = 6.22, 13.4), 1.75-0.6 (m, 17), 0.986 (s, 3), 0.870 (s, 3), 0.870 (s, 9), 0.797 (s, 3), 0.0506 (s, 3), 0.0335 (s, 6), 0.0210 (s, 3). <sup>13</sup>C{<sup>1</sup>H} NMR (100 MHz) δ 150.9 (C), 110.4 (CH<sub>2</sub>), 73.3 (CH), 71.9 (CH), 66.4 (C), 61.6 (CH), 53.4 (CH), 48.5 (C), 45.0 (CH), 44.5 (CH), 38.4 (CH<sub>2</sub>), 36.9 (CH<sub>2</sub>), 32.4 (CH), 31.8 (CH<sub>2</sub>), 31.4 (CH<sub>2</sub>), 31.3 (CH<sub>2</sub>), 28.5 (CH<sub>2</sub>), 26.6 (CH<sub>2</sub>), 26.0 (CH<sub>3</sub>), 25.9 (CH<sub>3</sub>), 18.2 (C), 18.1 (C), 12.2 (CH<sub>3</sub>), 11.4 (CH<sub>3</sub>), -3.8 (CH<sub>3</sub>), -4.2 (CH<sub>3</sub>), -4.6 (CH<sub>3</sub>). [*α*]<sub>D</sub> +12.7 (*c* = 1.09, CH<sub>2</sub>Cl<sub>2</sub>). Anal. Calcd for C<sub>33</sub>H<sub>59</sub>O<sub>6</sub>Si<sub>2</sub>F<sub>3</sub>S: C, 57.53; H, 8.39. Found: C, 57.90; H, 8.59.

**3β,12β-Di(*t*-butyldimethylsilyloxy)-16α,17α-oxido-20-methoxycarbonyl-5α-pregn-20-ene (3).** To a solution of **5a** (5.7 g, 8.0 mmol) in THF (80 mL) was added MeOH (6.5 mL, 320 mmol, freshly distilled from Mg under N<sub>2</sub>) and NEt<sub>3</sub> (2.3 mL), then CO was bubbled through the solution for 15 min. To this was added PPh<sub>3</sub> (13 mg, 0.048

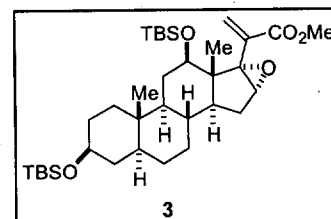

mmol) and Pd(OAc)<sub>2</sub> (5.4 mg, 0.024 mmol) and CO was again bubbled through for 15 min. The solution was kept under CO (1 atm) for 7.5 h and same amount of the catalyst was added and stirred for additional 12 h. The color of the solution had changed from yellow to pink during this time period. This was diluted with H<sub>2</sub>O (20 mL) and extracted with EtOAc (10 mL × 3). Combined organic layers was washed with brine (30 mL), dried, concentrated and flash chromatographed (2.5% EtOAc/hexanes) on basic Al<sub>2</sub>O<sub>3</sub> to give **3** (4.1 g, 6.7 mmol, 83%) as a clear, colorless oil: *R*<sub>f</sub> 0.27 (10% EtOAc/hexanes). <sup>1</sup>H NMR (400 MHz) δ 6.22 (d, 1, *J* = 1.48), 5.83 (d, 1, *J* = 1.51), 3.94 (dd, 1, *J* = 5.06, 10.5), 3.73 (s, 3), 3.52 (sept, 1, *J* = 5.10), 3.33 (s, 1), 1.89 (dd, 1, *J* = 6.18, 13.0), 1.75-0.93 (m, 18), 0.87 (s, 9), 0.83 (s, 9), 0.78 (s, 3), 0.70-0.057 (m, 2), -0.33 (s, 6), 0.0078 (s, 3), -0.012 (s, 3). <sup>13</sup>C{<sup>1</sup>H} NMR (100 MHz) δ 166.6, 137.5, 128.7, 73.3, 72.0, 67.7, 61.2, 53.6, 51.7, 49.5, 45.0, 43.6, 38.4, 37.0, 35.5, 32.6, 31.9, 31.8,

<sup>11</sup> (a) Comins, D. L.; Dehghani, A. *Tetrahedron Lett.* **1992**, 33, 6299. (b) Comins, D. L.; Dehghani, A.; Foti, C. J.; Joseph, S. P. *Org. Synth.* **1997**, 74, 77.

31.4, 29.7, 28.5, 27.1, 26.2, 25.9, 18.3, 12.3, 11.0, -4.6, -4.0, -2.8. IR (thin film) 1721.  $[\alpha]_D +30.4$  ( $c = 0.0048$ ,  $\text{CH}_2\text{Cl}_2$ ). Anal. Calcd for  $\text{C}_{35}\text{H}_{62}\text{O}_5\text{Si}_2$ : C, 67.91; H, 10.10. Found: C, 67.85; H, 10.10.

**3 $\beta$ ,12 $\beta$ -Di(*t*-butyldimethylsilyloxy)-16 $\alpha$ ,17 $\alpha$ -oxido-5 $\alpha$ -pregn-20-ene (4a)**

from 3 $\beta$ ,12 $\beta$ -Di(*t*-butyldimethylsilyloxy)-16 $\alpha$ ,17 $\alpha$ -oxido-20-trifluoromethane-sulfonyloxy-5 $\alpha$ -pregn-20-ene (5a). The suspension of 5a (71 mg, 0.1 mmol), LiCl (13 mg, 0.3 mmol) and Pd(PPh<sub>3</sub>)<sub>4</sub> (12 mg, 0.01 mmol) was in THF (400  $\mu\text{L}$ , degassed) was

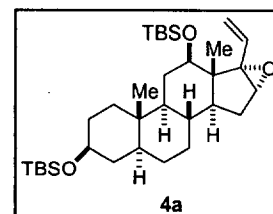

stirred until becoming yellow and cloudy (~2 min). To this was added Bu<sub>3</sub>SnH (32  $\mu\text{L}$ , 35 mg, 0.12 mmol) dropwise over 1 min. The solution became clear during the addition, then again turned cloudy within 30 min. After 9 h of stirring, the solution was diluted with Et<sub>2</sub>O (wet, 1 mL), DBU (30  $\mu\text{L}$ ) was added, and titrated with 0.1 M I<sub>2</sub>/Et<sub>2</sub>O until the color remained.<sup>12</sup> The brown suspension was then filtered through a plug of deactivated silica and concentrated to give yellow oil as 1: 0.5: 0.25 mixture of 4a, 5a and 7a ( $\alpha$  isomer) (ratio determined by <sup>1</sup>H NMR). Flash chromatography (2.5% EtOAc/hexanes) on deactivated silica afforded a 2:1 mixture of 4a and 5a (ratio determined by <sup>1</sup>H NMR) both as white solids (46 mg, 0.076 mmol, 76%). Pure sample of 4a was obtained as shown below.

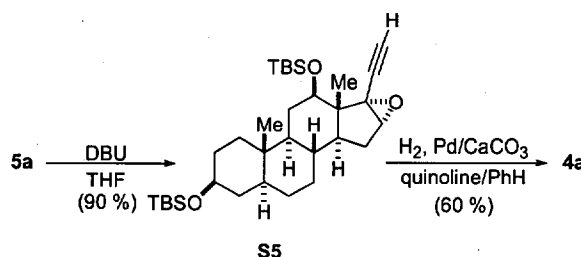

**3 $\beta$ ,12 $\beta$ -Di(*t*-butyldimethylsilyloxy)-16 $\alpha$ ,17 $\alpha$ -oxido-5 $\alpha$ -pregn-20-yne (S5).** To a stirring solution of 5a (503 mg, 0.71 mmol) in THF (2.8 mL) was added DBU (117  $\mu\text{L}$ , 130 mg, 0.85 mmol), and the mixture was heated to reflux for 22 hr. After being cooled to rt, the solution was poured into sat. NaHCO<sub>3</sub> (30 mL) and extracted with CH<sub>2</sub>Cl<sub>2</sub> (10 mL  $\times$  3).

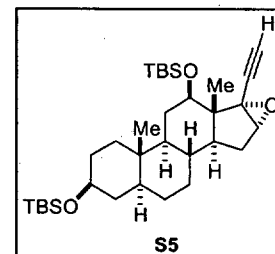

Combined extracts were washed with brine (30 mL), dried and concentrated to give a white solid. This was resubjected to the reaction conditions, heated to reflux for additional 22 hr, and worked up as above. Flash chromatography with 2% EtOAc/hexanes afforded S5 (357 mg, 0.64 mmol, 90 %) as a white solid, mp

63.5-65 °C. *R<sub>f</sub>* 0.43 (10% EtOAc/hexanes). <sup>1</sup>H NMR (400 MHz) δ 3.70 (dd, 1, *J* = 4.84, 10.6), 3.52 (sept, 1, *J* = 5.31), 3.96 (s, 1), 2.27 (s, 1), 1.87 (dd, 1, *J* = 6.43, 13.5), 1.75-1.65 (m, 3), 1.6-1.5 (m, 3), 1.5-1.2 (m, 10), 0.91 (s, 3), 0.90 (s, 3), 0.86 (s, 9), 0.79 (s, 3), 0.70 (m, 1), 0.12 (s, 3), 0.067 (s, 3), 0.022 (s, 6). <sup>13</sup>C{<sup>1</sup>H} NMR (100 MHz) δ 80.8, 72.9, 72.4, 71.9, 62.5, 58.6, 53.6, 48.5, 45.0, 43.3, 38.4, 36.8, 35.5, 32.9, 31.8, 31.4, 31.2, 28.5, 27.0, 26.1, 25.9, 18.2, 12.2, 11.2, -4.26, -4.45, -4.60. IR (thin film) 3310. [ $\alpha$ ]<sub>D</sub> +22.3 (*c* = 0.0118, CH<sub>2</sub>Cl<sub>2</sub>). Anal. Calcd for C<sub>33</sub>H<sub>58</sub>O<sub>3</sub>Si<sub>2</sub>: C, 70.91; H, 10.46. Found: C, 70.54; H, 10.60.

**3 $\beta$ ,12 $\beta$ -Di(*t*-butyldimethylsilyloxy)-16 $\alpha$ ,17 $\alpha$ -oxido-5 $\alpha$ -pregn-20-ene (4a)**

from 3 $\beta$ ,12 $\beta$ -Di(*t*-butyldimethylsilyloxy)-16 $\alpha$ ,17 $\alpha$ -oxido-5 $\alpha$ -pregn-20-yne (S5).

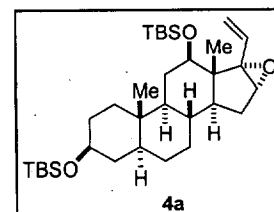

The suspension of S5 (55 mg, 0.098 mmol), Pd/CaCO<sub>3</sub> (Lindlar catalyst, 10 mg)<sup>13</sup> and

quinoline (10  $\mu$ L, distilled and stored under nitrogen) in benzene (100  $\mu$ L) was placed under H<sub>2</sub> (1 atm) for 1.5 h.

This was filtered through a plug of celite and concentrated. Purification by flash chromatography (hexanes as eluent) on deactivated silica afforded **4a** (33 mg, 0.059 mmol, 60%) as a white solid, mp 63.5-65 °C. *R<sub>f</sub>* 0.54 (10% EtOAc/hexanes). <sup>1</sup>H NMR (400 MHz) δ 6.32 (dd, 1, *J* = 10.8, 17.1), 5.23 (dd, 1, *J* = 2.01, 17.1), 5.02 (dd, 1, *J* = 2.02, 10.8), 3.66 (dd, 1, *J* = 4.71, 10.6), 3.53 (sept, 1, *J* = 5.35), 3.14 (s, 1), 1.86 (dd, 1, *J* = 6.17, 13.1), 1.8-1.5 (m, 5), 1.45-0.65 (m, 12), 1.24 (s, 3), 0.867 (s, 18), 0.798 (s, 3), 0.032 (s, 6), 0.003 (s, 6). <sup>13</sup>C{<sup>1</sup>H} NMR (100 MHz) δ 133.4 (CH), 114.4 (CH<sub>2</sub>), 73.2 (CH), 72.0 (CH), 68.5 (C), 64.7 (CH), 53.6 (CH), 47.7 (C), 45.1 (H), 44.1 (CH), 38.5 (CH<sub>2</sub>), 36.9 (CH<sub>2</sub>), 35.5 (C), 32.8 (CH), 31.9 (CH<sub>2</sub>), 31.5 (CH<sub>2</sub>), 31.3 (CH<sub>2</sub>), 28.6 (CH<sub>2</sub>), 27.4 (CH<sub>2</sub>), 26.0 (CH<sub>3</sub>), 25.9 (CH<sub>3</sub>), 18.3 (C), 18.0 (C), 12.2 (CH<sub>3</sub>), 10.9 (CH<sub>3</sub>), -3.75 (CH<sub>3</sub>), -4.53 (CH<sub>3</sub>), -4.59 (CH<sub>3</sub>), -4.60 (CH<sub>3</sub>). IR (thin film) 1734. [ $\alpha$ ]<sub>D</sub> -20.3 (*c* = 0.0101, CH<sub>2</sub>Cl<sub>2</sub>). Anal. Calcd for C<sub>33</sub>H<sub>60</sub>O<sub>3</sub>Si<sub>2</sub>: C, 70.65; H, 10.78. Found: C, 70.35; H, 11.09.

**3 $\beta$ ,12 $\beta$ -Di(*t*-butyldimethylsilyloxy)-5 $\alpha$ ,17 $\beta$ -pregn-20-en-16 $\alpha$ -ol (8a) from**

3 $\beta$ ,12 $\beta$ -Di(*t*-butyldimethylsilyloxy)-16 $\alpha$ ,17 $\alpha$ -oxido-5 $\alpha$ -pregn-20-ene (**4a**). To a

yellow, cloudy solution of **4a** (28.1 mg, 0.05 mmol), LiCl (9.2 mg, 0.15 mmol, dried),

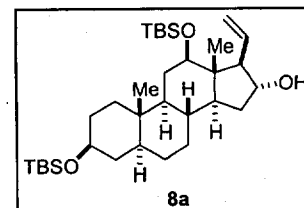

Pd(OAc)<sub>2</sub> (2.2 mg, 0.01 mmol) and PPh<sub>3</sub> (5.2 mg, 0.02 mmol) in THF (250  $\mu$ L, degassed) was added Bu<sub>3</sub>SnH (16  $\mu$ L, 18 mg, 0.06 mmol) dropwise. This was stirred for 4 h while the hydride (16  $\mu$ L) was added during the first 3 h

<sup>12</sup> Curran, D. P.; Chang, C. *J. Org. Chem.* **1989**, *54*, 3140.



(48  $\mu$ L, overall). The solution was diluted with Et<sub>2</sub>O (wet, 1 mL), DBU (30  $\mu$ L) was added, and the solution was titrated with 0.1 M I<sub>2</sub>/Et<sub>2</sub>O until the color remained.<sup>14</sup> The suspension was then filtered through a plug of deactivated silica and concentrated. Flash chromatography (0%→10% EtOAc/hexanes) gave **4a** (8 mg, 0.014 mmol, 28%) and **8a** (15 mg, 0.026 mmol, 52%) as white solids. Attempts to further purify the homoallyl alcohol **8a** for microanalysis was unsuccessful, due to the presence of a co-polar impurity. The C-3 hydroxy derivative (**S6**) was purified and fully characterized instead.

**8a**: R<sub>f</sub> 0.17 (10% EtOAc/hexanes). <sup>1</sup>H NMR (400 MHz)  $\delta$  6.03 (ddd, 1,  $J$  = 10.4, 17.5), 5.06 (br d, 1,  $J$  = 17.4), 5.00 (br d, 1,  $J$  = 11.0), 4.13 (br dd, 1,  $J$  = 7.11, 7.11), 3.53 (sept, 1,  $J$  = 5.11), 3.46 (dd, 1,  $J$  = 4.46, 10.8), 2.00 (br dd, 1,  $J$  = 6.71, 6.70), 1.8–0.65 (m, 18), 0.849 (s, 3), 0.845 (s, 9), 0.783 (s, 3), 0.673 (s, 3), 0.0343 (s, 6), 0.0306 (s, 6). <sup>13</sup>C{<sup>1</sup>H} NMR (100 MHz)  $\delta$  138.6 (CH), 114.5 (CH<sub>2</sub>), 80.7 (CH), 79.5 (CH), 75.9 (CH), 72.1 (CH), 65.0 (CH), 53.1 (CH), 51.6 (CH), 49.5 (C), 45.0 (CH), 38.5 (CH<sub>2</sub>), 37.0 (CH<sub>2</sub>), 35.4 (CH<sub>2</sub>), 34.1 (C), 31.9 (CH<sub>2</sub>), 31.7 (CH<sub>2</sub>), 30.8 (CH<sub>2</sub>), 28.6 (CH<sub>2</sub>), 26.1 (CH<sub>3</sub>), 25.9 (CH<sub>3</sub>), 18.3 (C), 18.1 (C), 12.3 (CH<sub>3</sub>), 9.6 (CH<sub>3</sub>), –3.5 (CH<sub>3</sub>), –4.6 (CH<sub>3</sub>), –16.9 (CH<sub>3</sub>). IR (thin film) 3391, 1638.

**12 $\beta$ -(*t*-butyldimethylsilyloxy)-5 $\alpha$ ,17 $\beta$ -pregn-20-ene-3 $\beta$ ,16 $\alpha$ -diol (**S6**). To a stirring solution of bis-protected alcohol **8a** (140 mg) in THF (400  $\mu$ L) and H<sub>2</sub>O (200  $\mu$ L) was added AcOH (600  $\mu$ L) dropwise. This was heated to 60 °C for 24.5 h. After being cooled to rt, H<sub>2</sub>O (20 mL) and ether (20 mL) was added and the aqueous layer was**

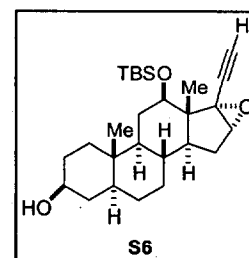

extracted with Et<sub>2</sub>O (10 mL  $\times$  3). A combined layer was washed with brine (30 mL), dried and concentrated.

Purification with flash chromatography (20%→100% EtOAc/hexanes) afforded **S6** (58 mg, 0.13 mmol, 43%) as a white solid. Analytical sample was obtained by recrystallization from hexanes as white granules, mp 174–175 °C (46 mg, 0.10 mmol, 34% in 2 steps). R<sub>f</sub> 0.22 (40% EtOAc/hexanes). <sup>1</sup>H NMR (400 MHz)  $\delta$  6.03 (ddd, 1,  $J$  = 7.38, 10.5, 17.6), 5.07 (d, 1,  $J$  = 17.4), 5.01 (d, 1,  $J$  = 10.5), 4.13 (br dd, 1,  $J$  = 7.42, 7.40), 3.58 (sept, 1,  $J$  = 4.89), 3.47 (dd, 1,  $J$  = 6.96), 1.85–0.65 (m, 19), 0.85 (s, 9), 0.79 (s, 3), 0.68 (s, 3), –0.0013 (s, 3), –0.0097 (s, 3). <sup>13</sup>C{<sup>1</sup>H} NMR (100 MHz)  $\delta$  138.6 (CH), 114.5 (CH<sub>2</sub>), 79.4 (CH), 75.9 (CH), 71.2 (CH), 65.0 (CH), 53.0 (CH), 51.5 (CH), 49.5 (C), 44.8 (CH), 38.0 (CH<sub>2</sub>), 36.7 (CH<sub>2</sub>), 35.4 (C), 34.9 (CH<sub>2</sub>), 34.1 (CH<sub>2</sub>), 34.1 (CH), 31.6 (CH<sub>2</sub>), 31.4 (CH<sub>2</sub>), 30.8 (CH<sub>2</sub>), 28.5

<sup>13</sup> Lindlar, H.; Dubuis, R. *Palladium catalyst for partial reduction of acetylenes*; Wiley, 1973; Collective vol. V: p. 880.

(CH<sub>2</sub>), 26.1 (C), 26.0 (CH<sub>3</sub>), 18.0 (C), 12.2 (CH<sub>3</sub>), 9.58 (CH<sub>3</sub>), -3.51 (CH<sub>3</sub>), -4.65 (CH<sub>3</sub>). IR (thin film) 3380, 1637.

[ $\alpha$ ]<sub>D</sub> -21.0 (*c* = 0.0113, CH<sub>2</sub>Cl<sub>2</sub>). Anal. Calcd for C<sub>27</sub>H<sub>47</sub>O<sub>3</sub>Si: C, 72.43; H, 10.58. Found: C, 72.75; H, 10.82.

**3 $\beta$ ,12 $\beta$ -Di(*t*-butyldimethylsilyloxy)-5 $\alpha$ -pregna-17(20),20-dien-16 $\alpha$ -ol (7a, $\alpha$ -isomer), 3 $\beta$ ,12 $\beta$ -Di(*t*-butyldimethylsilyloxy)-5 $\alpha$ -pregna-17(20),20-dien-16 $\beta$ -ol (7a, $\beta$ -isomer) and 3 $\beta$ ,12 $\beta$ -Di(*t*-butyldimethylsilyloxy)-5 $\alpha$ -pregna-17(20),20-diene-16-one (10a).** To a solution of **5a** (142 mg, 0.2 mmol) in THF (1 mL, degassed)

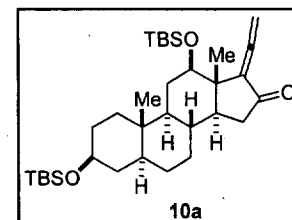

was added Pd<sub>2</sub>(dba)<sub>3</sub>·CHCl<sub>3</sub> (114 mg, 0.11 mmol) and PPh<sub>3</sub> (115 mg, 0.44 mmol), and stirred at rt for 16 h. The solution was diluted with Et<sub>2</sub>O (10 mL), filtered through a plug of celite and concentrated. Flash chromatography (2.5%→5% EtOAc/hexanes) afforded **10a** (21 mg, 0.038 mmol, 19%) and an isomeric mixture of **7a** which contained substantial amount of DBA. Attempts to purify this mixture were unsuccessful. The spectral data of **7a** were identical to those obtained from the preparation described below. An analytical sample of **10a** was achieved by Dess-Martin oxidation of **7a**, shown below.

**3 $\beta$ ,12 $\beta$ -Di(*t*-butyldimethylsilyloxy)-5 $\alpha$ -pregna-17(20),20-dien-16 $\alpha$ -ol (7a, $\alpha$ -isomer) and 3 $\beta$ ,12 $\beta$ -Di(*t*-butyldimethylsilyloxy)-5 $\alpha$ -pregna-17(20),20-dien-16 $\beta$ -ol (7a, $\beta$ -isomer) by catalytic Pd**

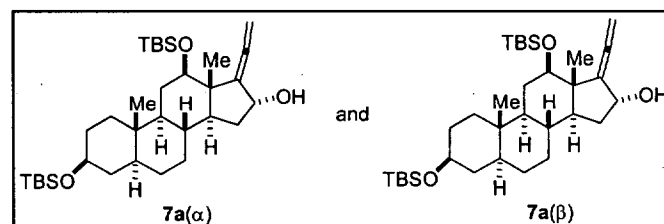

**reaction.** To a suspension of **5a** (142 mg, 0.20 mmol), LiCl (25 mg, 0.6 mmol), Pd(OAc)<sub>2</sub> (4.5 mg, 0.02 mmol) and PPh<sub>3</sub> (10.5 mg, 0.04 mmol) in THF (1 mL, degassed) was stirred until becoming yellow and cloudy. To this was added (Bu<sub>3</sub>Sn)<sub>2</sub> (101  $\mu$ L, 116 mg, 0.2 mmol) followed by (Bu<sub>3</sub>Sn)<sub>2</sub>O (102  $\mu$ L, 119 mg, 0.2 mmol) dropwise. The solution turned clear orange upon addition. After stirring at rt for 4.5 h, this was warmed to 40 °C and stirred for 17 h. The solution was then diluted with Et<sub>2</sub>O (10 mL), concentrated, flash chromatographed (10% EtOAc/hexanes) on deactivated silica to give **7a** ( $\alpha$ -isomer) (20.8 mg, 0.037 mmol, 19%), 1:1 mixture (ratio determined by <sup>1</sup>H NMR) of  $\alpha$  and  $\beta$  isomers (42.5 mg, 0.076 mmol, 38%) and **7a** ( $\beta$ -isomer) (8.4 mg, 0.015 mmol, 8%), both as white solids.

**7a** ( $\alpha$ -isomer): R<sub>f</sub> 0.13 (10% EtOAc/hexanes). mp 70-71.5 °C. <sup>1</sup>H NMR (400 MHz)  $\delta$  4.90 (dd, 1, *J* = 10.2, 3.04), 4.87 (dd, 1, *J* = 10.1, 2.98), 4.69 (m, 1), 3.74 (s, 1, *J* = 10.7, 4.82), 3.54 (sept, 1, *J* = 4.89), 1.8-1.2 (m, 12),

1.1-0.7 (m, 7), 0.87 (s, 9), 0.86 (s, 9), 0.79 (s, 3), 0.36 (s, 6), 0.27 (s, 3), 0.20 (s, 3).  $^{13}\text{C}\{^1\text{H}\}$  NMR (100 MHz)  $\delta$  201.7 (C), 116.6 (C), 80.1 ( $\text{CH}_2$ ), 76.9 (CH), 72.7 (CH), 72.0 (CH), 53.0 (CH), 50.9 (CH), 45.0 (CH), 38.5 ( $\text{CH}_2$ ), 37.0 ( $\text{CH}_2$ ), 35.5 ( $\text{CH}_2$ ), 34.7 ( $\text{CH}_2$ ), 33.8 (CH), 31.9 ( $\text{CH}_2$ ), 31.5 ( $\text{CH}_2$ ), 28.5 ( $\text{CH}_2$ ), 26.2 ( $\text{CH}_3$ ), 25.9 ( $\text{CH}_3$ ), 18.2 (C), 13.9 ( $\text{CH}_3$ ), 12.3 ( $\text{CH}_3$ ), -2.91 ( $\text{CH}_3$ ), -4.39 ( $\text{CH}_3$ ), -4.58 ( $\text{CH}_3$ ). IR (thin film) 3408, 1958.  $[\alpha]_{\text{D}} -19.3$  ( $c = 0.0072$ ,  $\text{CH}_2\text{Cl}_2$ ). Anal. Calcd for  $\text{C}_{35}\text{H}_{60}\text{O}_3\text{Si}_2$ : C, 70.65; H, 10.78. Found: C, 70.47; H, 11.00.

**7a** ( $\beta$ -isomer):  $R_f$  0.10 (10% EtOAc/hexanes). mp 110.5-111.5 °C.  $^1\text{H}$  NMR (400 MHz)  $\delta$  4.91 (dd, 1,  $J = 3.41, 10.2$ ), 4.76 (dd, 1,  $J = 3.19, 10.2$ ), 4.63 (m, 1), 3.62 (dd, 1,  $J = 4.78, 10.7$ ), 3.53 (sept, 1,  $J = 5.26$ ), 2.14 (m, 1), 1.78 (d, 1,  $J = 3.98$ ), 1.7-0.6 (m, 17), 1.05 (s, 3), 0.869 (s, 9), 0.860 (s, 9), 0.801 (s, 3), 0.034 (s, 6), 0.027 (s, 3), 0.0153 (s, 3).  $^{13}\text{C}\{^1\text{H}\}$  NMR (100 MHz)  $\delta$  203.4, 115.3, 74.2, 72.0, 53.1, 50.6, 49.9, 45.0, 38.5, 37.0, 35.5, 34.3, 33.6, 31.9, 31.7, 31.4, 28.5, 26.2, 25.9, 18.2, 14.7, 12.3, -3.03, -4.42, -4.58. IR (thin film) 3418, 1960.  $[\alpha]_{\text{D}} +41.8$  ( $c = 0.009$ ,  $\text{CH}_2\text{Cl}_2$ ). Anal. Calcd for  $\text{C}_{35}\text{H}_{60}\text{O}_3\text{Si}_2$ : C, 70.65; H, 10.78. Found: C, 70.47; H, 11.16.

**3 $\beta$ ,12 $\beta$ -Di(*t*-butyldimethylsilyloxy)-5 $\alpha$ -pregna-17(20),20-diene-16-one (10a)**  
 from **3 $\beta$ ,12 $\beta$ -Di(*t*-butyldimethylsilyloxy)-5 $\alpha$ -pregna-17(20),20-dien-16 $\alpha$ -ol (7a, $\alpha$ -isomer)** and **3 $\beta$ ,12 $\beta$ -Di(*t*-butyldimethylsilyloxy)-5 $\alpha$ -pregna-17(20),20-dien-16 $\beta$ -ol (7a, $\beta$ -isomer)**. To a solution of isomers **7a** (24.8 mg, 0.044 mmol) in  $\text{CH}_2\text{Cl}_2$  (300  $\mu\text{L}$ )

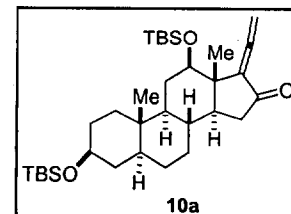

was added Dess-Martin periodinane<sup>15</sup> (25 mg, 0.05 mmol). The resulting mixture was stirred for 1.5 h, diluted with  $\text{CH}_2\text{Cl}_2$  (10 mL), poured into saturated  $\text{NaHCO}_3$  (20 mL) and the aqueous layer was extracted with  $\text{CH}_2\text{Cl}_2$  (10 mL  $\times$  3). The combined organic layers were washed with brine (20 mL), dried, concentrated and flash chromatographed (2% EtOAc/hexanes) to give **10a** (22.7 mg, 0.041 mmol, 92%) as a white solid, mp 66.5-67.5 °C.  $R_f$  0.18 (20% EtOAc/hexanes).  $^1\text{H}$  NMR (400 MHz)  $\delta$  5.24 (d, 1,  $J = 14.4$ ), 5.15 (d, 1,  $J = 14.4$ ), 3.83 (dd, 1,  $J = 4.83, 10.7$ ), 3.54 (sept, 1,  $J = 5.04$ ), 2.28 (dd, 1,  $J = 6.83, 17.3$ ), 2.16 (dd, 1,  $J = 13.3, 17.0$ ), 1.75 (ddd, 1,  $J = 4.48, 8.97, 13.2$ ), 1.75-0.8 (m, 15), 1.07 (s, 3), 0.872 (s, 9), 0.861 (s, 9), 0.830 (s, 3), 0.0386 (s, 9), 0.0234 (s, 3).  $^{13}\text{C}\{^1\text{H}\}$  NMR (100 MHz)  $\delta$  206.4 (C), 206.3 (C), 113.7 (C), 81.5 ( $\text{CH}_2$ ), 76.4 (CH), 72.0 (CH), 52.7 (CH), 49.7 (CH), 48.9 (C), 44.9 (CH), 38.7 ( $\text{CH}_2$ ), 38.4 ( $\text{CH}_2$ ), 36.8 ( $\text{CH}_2$ ), 35.6 (C), 33.4 (CH), 31.8 ( $\text{CH}_2$ ), 31.7 ( $\text{CH}_2$ ), 31.3 ( $\text{CH}_2$ ), 28.4 ( $\text{CH}_2$ ), 26.1 ( $\text{CH}_3$ ), 25.9 ( $\text{CH}_3$ ), 18.3 (C), 18.2 (C), 14.4 ( $\text{CH}_3$ ), 12.3 ( $\text{CH}_3$ ), -2.90 ( $\text{CH}_3$ ), -4.42 ( $\text{CH}_3$ ), -4.58 ( $\text{CH}_3$ ). IR (thin film) 1965,

<sup>15</sup> (a) Dess, D. B.; Martin, J. C. *J. Org. Chem.* **1983**, *48*, 4155. (b) Dess, D. B.; Martin, J. C. *J. Am. Chem. Soc.* **1991**, *113*, 7277.

1935, 1717.  $[\alpha]_D -71.6$  ( $c = 0.019$ ,  $\text{CH}_2\text{Cl}_2$ ). Anal. Calcd for  $\text{C}_{33}\text{H}_{58}\text{O}_3\text{Si}_2$ : C, 70.91; H, 10.46. Found: C, 71.14; H, 10.69.

**3 $\beta$ ,12 $\beta$ -Di(*t*-butyldimethylsilyloxy)-16,17-seco-5 $\alpha$ -pregn-17(20)-yn-16-al**

**(11a).** To a solution of **5a** (142 mg, 0.20 mmol) in THF (800  $\mu\text{L}$ , degassed) was added  $\text{Pd}(\text{OAc})_2$  (2.2 mg, 0.01 mmol) and  $\text{PPh}_3$  (5.2 mg, 0.02 mmol). The mixture was stirred under Ar until becoming yellow and clear and  $\text{Bu}_3\text{SnH}$  (59  $\mu\text{L}$ , 64 mg, 0.22 mmol) was then dropwise, whereupon the solution turned orange. Stirring was continued for 1.5 h while being monitored by TLC. Additional hydride was added in portions during this time period (60  $\mu\text{L}$  each, 4 times total). This was then diluted with  $\text{Et}_2\text{O}$  (10 mL), concentrated and flash chromatographed (0.25%  $\rightarrow$  5%  $\text{EtOAc}$ /hexanes) on deactivated silica to give aldehyde **11a** (63 mg, 0.11 mmol, 56%) of about 95% purity as a clear light yellow oil:  $R_f$  0.40 (10%  $\text{EtOAc}$ /hexanes).  $^1\text{H}$  NMR (400 MHz)  $\delta$  9.76 (d, 1,  $J = 2.60$ ), 3.62 (dd, 1,  $J = 4.29$ , 11.4), 3.52 (sept, 1,  $J = 5.20$ ), 2.78 (dd, 1,  $J = 2.85$ , 17.3), 2.34 (ddd, 1,  $J = 2.90$ , 7.43, 17.2), 1.88 (ddd, 1,  $J = 3.06$ , 7.44, 10.7), 1.70 (s, 3), 1.66-0.76 (m, 15), 0.968 (s, 3), 0.885 (s, 9), 0.862 (s, 9), 0.734 (s, 3).  $^{13}\text{C}\{^1\text{H}\}$  NMR (100 MHz)  $\delta$  202.8 (C), 86.7 (C), 77.2 (C), 76.8 (CH), 71.9 (CH), 50.8 (CH), 45.9 ( $\text{CH}_2$ ), 45.3 (CH), 44.4 (CH), 42.8 (C), 38.3 ( $\text{CH}_2$ ), 36.8 ( $\text{CH}_2$ ), 36.0 ( $\text{CH}_2$ ), 35.4 (CH), 32.0 ( $\text{CH}_2$ ), 31.7 ( $\text{CH}_2$ ), 29.7 ( $\text{CH}_2$ ), 28.5 ( $\text{CH}_2$ ), 25.9 ( $\text{CH}_3$ ), 25.8 ( $\text{CH}_3$ ), 18.2 (C), 18.1 (C), 13.8 ( $\text{CH}_3$ ), 12.2 ( $\text{CH}_3$ ), 3.5 ( $\text{CH}_3$ ), -4.3 ( $\text{CH}_3$ ), -4.6 ( $\text{CH}_3$ ), -4.9 ( $\text{CH}_3$ ). IR (thin film) 2736, 1725.  $[\alpha]_D -34.8$  ( $c = 0.0029$ ,  $\text{CH}_2\text{CH}_2$ ). Attempts to further purify this compound for microanalysis were unsuccessful, due to the instability of this compound.

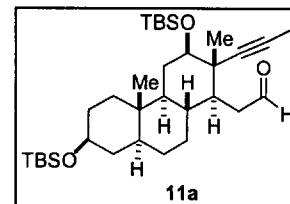

**3 $\beta$ -(*t*-butyldimethylsilyloxy)-16 $\alpha$ ,17 $\alpha$ -oxidopregn-5-ene-20-one (2b).** To a stirring solution of epoxy alcohol **6** (2.49 g, 7.59 mmol) in  $\text{CH}_2\text{Cl}_2$  (30 mL) was added  $\text{NEt}_3$  (1.25 mL, 901 mg, 9.00 mmol),  $\text{TBSCl}$  (1.26 g, 8.35 mmol) and DMAP (one spatulas). After stirring for 23 h, the solution was poured into  $\text{H}_2\text{O}$  (50 mL) and extracted with  $\text{CH}_2\text{Cl}_2$  (20 mL  $\times$  3). The combined organic layers was washed with 1 M  $\text{HCl}$  (70 mL), saturated  $\text{NaHCO}_3$  (70 mL), brine (70 mL), dried, concentrated and flash chromatographed (2.5%  $\text{EtOAc}$ /hexanes) to give ketone **2b** (2.67 g, 6.03 mmol, 80 %).  $R_f$  0.51 (20%  $\text{EtOAc}$ /hexanes). mp 118-119  $^\circ\text{C}$ .  $^1\text{H}$  NMR (400 MHz)  $\delta$  5.28 (d, 1,  $J = 5.37$ ), 3.66 (s, 1), 3.45 (sept, 1,  $J = 4.72$ ), 2.24 (m, 1), 2.14 (ddd, 1,  $J = 2.22$ , 5.08, 13.4), 2.01 (s, 3), 1.94 (dd, 1,  $J = 6.15$ , 19.5), 1.9-0.8 (m, 14), 1.02 (s, 3), 0.99 (s, 3), 0.867 (s, 9), 0.0369 (s, 6).  $^{13}\text{C}\{^1\text{H}\}$  NMR (100 MHz)

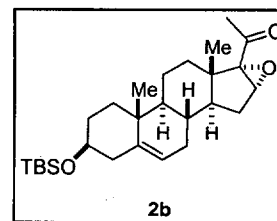

$\delta$  204.8 (C), 141.8 (CH), 120.4 (CH), 72.4 (CH), 70.9 (C), 60.4 (CH), 50.3 (CH), 45.5 (CH), 42.7 (CH<sub>2</sub>), 41.4 (C), 37.2 (CH<sub>2</sub>), 36.7 (C), 31.9 (CH<sub>2</sub>), 31.4 (CH<sub>2</sub>), 31.3 (CH<sub>2</sub>), 29.7 (CH), 27.5 (CH<sub>2</sub>), 25.9 (CH), 25.9 (CH<sub>3</sub>), 20.4 (CH<sub>2</sub>), 19.3 (CH<sub>3</sub>), 18.2 (C), 15.1 (CH<sub>3</sub>). IR (thin film) 1703.  $[\alpha]_D -8.75$  ( $c = 0.0088$ , CH<sub>2</sub>CH<sub>2</sub>). Anal. Calcd for C<sub>27</sub>H<sub>44</sub>O<sub>3</sub>Si: C, 72.92; H, 9.97. Found: C, 72.86; H, 10.18.

**3 $\beta$ -(*t*-butyldimethylsilyloxy)-16 $\alpha$ ,17 $\alpha$ -oxido-20-**

**(trifluoromethanesulfonyloxy) pregna-5,20-diene (5b).** To a cold ( $-78^\circ\text{C}$ ) solution of **2b** (2.95 g, 6.67 mmol) and PhNTf<sub>2</sub> (2.88 g, 8.00 mmol) in THF (33 mL) was added KHMDS (0.5 M in toluene, 16 mL, 8.00 mmol) dropwise over 45 min with cannula.

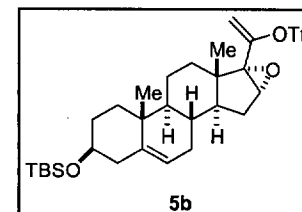

The stirring was continued at this temperature for 2 h after the completion of the addition. The solution was warmed to rt, concentrated, and the brown residue was flash chromatographed (1%→5% EtOAc/hexanes) to give triflate **5b** (3.25 g, 5.66 mmol, 85 %) as a white solid, mp  $77-79^\circ\text{C}$ .  $R_f$  0.53 (20% EtOAc/hexanes). <sup>1</sup>H NMR (400 MHz)  $\delta$  5.44 (d, 1,  $J = 3.88$ ), 5.36 (d, 1,  $J = 3.86$ ), 5.29 (br d, 1,  $J = 5.00$ ), 3.64 (s, 1), 3.47 (sept, 1,  $J = 4.75$ ), 2.0-0.8 (m, 16), 2.27-2.14 (m, 2), 1.00 (s, 3), 0.928 (s, 3), 0.873 (s, 9), 0.0431 (s, 6). <sup>13</sup>C{<sup>1</sup>H} NMR (100 MHz)  $\delta$  150.7 (C), 141.6 (C), 120.4 (CH), 109.3 (CH<sub>2</sub>), 72.3 (CH), 67.7 (C), 60.6 (CH), 50.2 (CH), 45.7 (CH), 42.7 (CH<sub>2</sub>), 41.7 (C), 37.1 (CH<sub>2</sub>), 36.6 (C), 31.9 (CH<sub>2</sub>), 31.6 (CH<sub>2</sub>), 31.3 (CH<sub>2</sub>), 30.1 (CH), 26.7 (CH<sub>2</sub>), 25.8 (CH<sub>3</sub>), 20.4 (CH<sub>2</sub>), 19.2 (CH<sub>3</sub>), 18.1 (C), 15.4 (C),  $-4.7$  (CH<sub>3</sub>). IR (thin film);  $[\alpha]_D -74.83$  ( $c = 0.0101$ , CH<sub>2</sub>CH<sub>2</sub>). Anal. Calcd for C<sub>28</sub>H<sub>44</sub>O<sub>5</sub>SiSF<sub>3</sub>: C, 58.21; H, 7.68. Found: C, 58.39; H, 7.85.

**3 $\beta$ -(*t*-Butyldimethylsilyloxy)-16 $\alpha$ ,17 $\alpha$ -oxidopregna-5,20-diene (4b) and 3 $\beta$ -(*t*-Butyldimethylsilyloxy)pregna-5,17(20),20-triene-16 $\alpha$ -ol (7b, $\alpha$ -isomer).** To a stirring yellow and cloudy

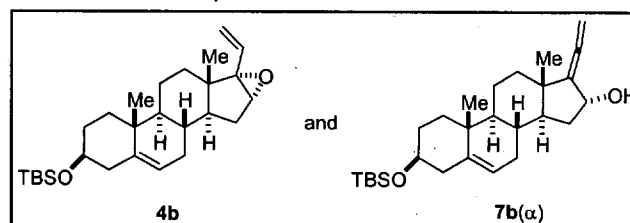

solution of **5b** (402 mg, 0.7 mmol), Pd(OAc)<sub>2</sub> (15 mg, 0.07 mmol), PPh<sub>3</sub> (37 mg, 0.14 mmol) and LiCl (89 mg, 2.1 mmol) in THF (2.6 mL, degassed) was added Bu<sub>3</sub>SnH (226  $\mu\text{L}$ , 244 mg, 0.84 mmol) dropwise over 5 min. The stirring was continued for 14.5 h. The solution was diluted with Et<sub>2</sub>O (2 mL), DBU (227  $\mu\text{L}$ , 252 mg, 1.6 mmol) was added and the solution was titrated with 1 M I<sub>2</sub>/Et<sub>2</sub>O solution until the color remained,<sup>14</sup> and was then filtered through a plug of deactivated silica and concentrated. Flash chromatography (0%→20% EtOAc/hexanes) on

deactivated silica gave allyl epoxide **4b** (70.7 mg, 0.17 mmol, 24%) and allenic alcohol **7b** ( $\alpha$ -isomer) (112 mg, 0.272 mmol, 39%) as a white solid.

Allyl epoxide **4b**:  $R_f$  0.63 (20% EtOAc/hexanes). mp 134-135 °C.  $^1\text{H}$  NMR (400 MHz)  $\delta$  6.12 (dd, 1,  $J = 10.8, 17.1$ ), 5.38 (dd, 1,  $J = 1.99, 17.1$ ), 5.29 (m, 1), 5.21 (dd, 1,  $J = 1.98, 10.8$ ), 3.46 (sept, 1,  $J = 4.87$ ), 3.27 (s, 1), 2.25-2.17 (m, 2), 1.9-0.8 (m, 15), 0.88 (s, 3), 0.87 (s, 12), 0.041 (s, 6).  $^{13}\text{C}\{^1\text{H}\}$  NMR (100 MHz)  $\delta$  141.7(C), 131.0 (CH), 120.7 (CH), 117.5 (CH<sub>2</sub>), 72.5 (CH), 69.5 (C), 63.2 (CH), 50.5 (CH), 45.6 (CH), 42.8 (CH<sub>2</sub>), 41.8 (C), 37.3 (CH<sub>2</sub>), 36.8 (C), 32.0 (CH<sub>2</sub>), 31.6 (CH<sub>2</sub>), 30.4 (CH), 27.7 (CH<sub>2</sub>), 25.9 (CH<sub>3</sub>), 20.5 (CH<sub>2</sub>), 19.4 (CH<sub>3</sub>), 18.2 (C), 15.6 (CH<sub>3</sub>), -4.62 (CH<sub>3</sub>). IR (thin film) 1667, 1637.  $[\alpha]_D -63.36$  ( $c = 0.0119$ , CH<sub>2</sub>CH<sub>2</sub>). Anal. Calcd for C<sub>27</sub>H<sub>44</sub>O<sub>2</sub>Si: C, 75.64; H, 10.34. Found: C, 75.27; H, 10.50.

**7b** ( $\alpha$ -isomer):  $R_f$  0.19 (30% EtOAc/hexanes). mp 153.5-154.5 °C.  $^1\text{H}$  NMR (500 MHz)  $\delta$  5.31 (m, 1), 4.99 (dd, 1,  $J = 3.21, 9.97$ ), 4.89 (dd, 1,  $J = 3.15, 9.96$ ), 4.83 (m, 1), 3.48 (sept, 1,  $J = 4.77$ ), 2.26 (m, 1), 2.17 (ddd, 1,  $J = 2.16, 4.92, 13.5$ ), 1.99 (m, 1), 1.8-0.8 (m, 18), 1.00 (s, 3), 0.88 (s, 9), 0.87 (s, 3), 0.05 (s, 6).  $^{13}\text{C}\{^1\text{H}\}$  NMR (100 MHz)  $\delta$  201.0 (C), 141.6 (C), 120.8 (CH), 118.4 (C), 80.1 (CH<sub>2</sub>), 72.4 (CH), 72.4 (CH), 52.7 (CH), 50.3 (CH), 44.7 (C), 42.7 (CH<sub>2</sub>), 37.3 (CH<sub>2</sub>), 36.7 (C), 36.1 (CH<sub>2</sub>), 35.6 (CH<sub>2</sub>), 32.0 (CH<sub>2</sub>), 31.6 (CH<sub>2</sub>), 31.4 (CH), 25.9 (CH<sub>3</sub>), 20.7 (CH<sub>2</sub>), 19.4 (CH<sub>3</sub>), 18.8 (CH<sub>3</sub>), 18.2 (C), -4.62 (CH<sub>3</sub>). IR (thin film) 3446, 1960.  $[\alpha]_D -74.83$  ( $c = 0.0101$ , CH<sub>2</sub>CH<sub>2</sub>). Anal. Calcd for C<sub>27</sub>H<sub>44</sub>O<sub>2</sub>Si: C, 75.64; H, 10.34. Found: C, 75.55; H, 10.14.

**[17(20)Z] and [17(20)E]-3 $\beta$ -(*t*-butyldimethylsilyloxy)pregna-5,17(20)-diene-16 $\alpha$ -ol (9b,Z and E),3 $\beta$ -(*t*-butyldimethylsilyloxy)pregna-**

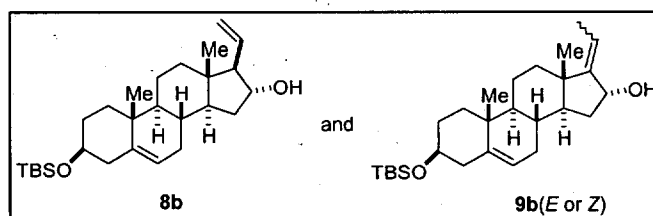

**5,20-diene-16 $\alpha$ -ol (8b).** To a stirring orange-yellow solution of **4b** (71.1 mg, 0.166 mmol), Pd(PPh<sub>3</sub>)<sub>4</sub> (17 mg, 0.015 mmol) and LiCl (24.7 mg, 0.583 mmol) in THF (650  $\mu\text{L}$ , degassed) was added Bu<sub>3</sub>SnH (49  $\mu\text{L}$ , 53 mg, 0.183 mmol). The orange color turned light yellow upon addition of the reagent and stirring was continued for 1 h. The solution was diluted with Et<sub>2</sub>O (2 mL), DBU (55  $\mu\text{L}$ , 61 mg, 0.4 mmol) was added, and the solution was titrated with 1 M I<sub>2</sub> in Et<sub>2</sub>O s until the color remained.<sup>14</sup> This was filtered through a plug of silica and concentrated. Flash chromatography with deactivated silica (0.5%→2% EtOAc/hexanes) afforded **9b** (Z isomer) (3.2 mg, 0.0074 mmol, 5%), allyl alcohol **9b** (E-isomer) (20.1 mg, 0.047 mmol, 28%) and a mixture of allyl alcohol **9b** (Z-isomer) and homoallyl alcohol **8b** (8.3 mg, 0.033 mmol, 21%), all as white solids. An analytical sample of **9b** (E-isomer) (7.4

mg, 0.017 mmol, 10%) was obtained by further purification of this mixture by chromatography on deactivated silica (1.5% EtOAc/hexanes).

**9b** (*Z*-isomer): *R*<sub>f</sub> 0.46 (20% EtOAc/hexanes). mp 91.5-92.5 °C. <sup>1</sup>H NMR (400 MHz) δ 5.33 (m, 2), 4.79 (m, 1), 3.48 (sept, 1, *J* = 4.92), 2.26 (m, 1), 2.17 (br dd, 1, *J* = 3.02, 13.4), 2.5-0.7 (m, 18), 1.56 (s, 3), 1.00 (s, 3), 0.877 (s, 9), 0.735 (s, 3), 0.0473 (s, 6). <sup>13</sup>C{<sup>1</sup>H} NMR (100 MHz) δ 156.1, 141.6, 120.9, 117.7, 72.5, 71.2, 52.0, 50.6, 43.9, 42.8, 37.3, 36.8, 36.6, 36.0, 32.1, 31.8, 31.1, 25.9, 21.0, 20.3, 19.4, 18.3, 14.6, -4.58. IR (thin film) 3602, 3152, 1725, 1602. [α]<sub>D</sub> -35.56 (*c* = 0.0009, CH<sub>2</sub>CH<sub>2</sub>).

**9b** (*E*-isomer): *R*<sub>f</sub> 0.42 (20% EtOAc/hexanes). mp 96.5-97 °C. <sup>1</sup>H NMR (400 MHz) δ 5.58 (q, 1, *J* = 7.19), 5.31 (m, 1), 4.43 (br s, 1), 3.47 (sept, 1, *J* = 5.00), 2.26 (m, 2), 2.16 (m, 1), 1.98 (br d, 1, *J* = 17.0), 1.8-0.7 (m, 16), 1.73 (d, 3, *J* = 7.17), 1.00 (s, 3), 0.876 (s, 9), 0.868 (s, 3), 0.0462 (s, 6). <sup>13</sup>C{<sup>1</sup>H} NMR (100 MHz) δ 155.4 (C), 141.5 (C), 120.9 (CH), 119.6 (CH), 78.9 (CH), 74.4 (CH), 72.5 (CH), 52.8 (CH), 50.2 (CH), 44.2 (C), 42.8 (C), 37.3 (CH<sub>2</sub>), 37.2 (CH<sub>2</sub>), 36.7 (C), 35.1 (CH<sub>2</sub>), 32.0 (CH<sub>3</sub>), 31.6 (CH<sub>2</sub>), 30.8 (CH), 25.9 (CH<sub>3</sub>), 21.1 (CH<sub>2</sub>), 19.4 (CH), 18.2 (C), 17.3 (CH), 13.2 (CH), -4.60 (CH<sub>3</sub>). IR (thin film) 3601, 1448, 1721, 1669. [α]<sub>D</sub> -47.27 (*c* = 0.0033, CH<sub>2</sub>CH<sub>2</sub>).  
Anal. Calcd for C<sub>27</sub>H<sub>48</sub>O<sub>2</sub>Si: C, 74.94; H, 11.18. Found: C, 74.58; H, 10.99.

**8b**: *R*<sub>f</sub> 0.42 (20% EtOAc/hexanes). mp 120-121 °C. <sup>1</sup>H NMR (400 MHz) δ 5.80 (ddd, 1, *J* = 8.63, 9.27, 17.9), 5.31 (m, 1), 5.14 (br d, 1, *J* = 4.67), 5.10 (br s, 1), 4.24 (br t, 1, *J* = 7.17), 3.48 (sept, 1, *J* = 4.83), 2.26 (m, 1), 2.16 (br dd, 1, *J* = 3.10, 13.2), 2.0-0.7 (m, 18), 1.90 (t, 1, *J* = 7.55), 0.989 (s, 3), 0.878 (s, 9), 0.656 (s, 3), 0.0469 (s, 6). <sup>13</sup>C{<sup>1</sup>H} NMR (100 MHz) δ 141.7, 136.9, 117.0, 76.6, 72.5, 66.2, 53.6, 50.4, 44.6, 42.8, 37.3, 36.7, 35.7, 32.1, 31.8, 31.5, 29.7, 25.9, 20.2, 19.5, 18.3, 14.1, -4.59. IR (thin film) 3401, 1660, 1638. [α]<sub>D</sub> -55.38 (*c* = 0.0013, CH<sub>2</sub>CH<sub>2</sub>).

**3β-(*t*-butyldimethylsilyloxy)pregna-5,17(20),20-triene-16α-ol (7b, α-isomer) and 3β-(*t*-butyldimethylsilyloxy)pregna-5,17(20),20-triene-16β-ol (7b, β-isomer).** Triflate **5b** (192 mg, 0.33 mmol),

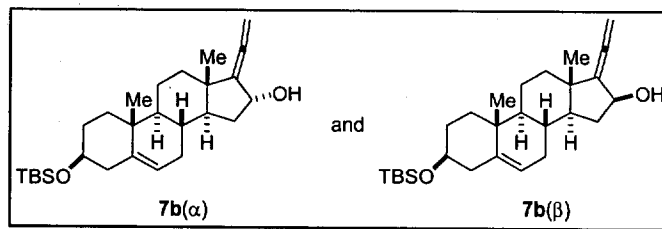

Pd(OAc)<sub>2</sub> (75 mg, 0.33 mol) and PPh<sub>3</sub> (438 mg, 1.67 mmol) was dissolved in THF (1 mL, degassed) and stirred at rt for 46 h and then at 40 °C for 19 h. After being cooled to rt, the solution was filtered through a plug of silica and concentrated. Flash chromatography (100% CH<sub>2</sub>Cl<sub>2</sub>) on basic Al<sub>2</sub>O<sub>3</sub> gave **7b** (α-isomer) (54.3 mg, 0.13 mmol,

38%), a mixture of  $\alpha$  and  $\beta$ -isomers (25.1 mg, 0.059 mmol, 18%) and **7b** ( $\beta$ -isomer) (35.1 mg, 0.082 mmol, 25%).

The spectral data of **7b** ( $\alpha$ -isomer) were identical to those obtained from catalytic Pd-reduction.

**7b** ( $\beta$ -isomer):  $R_f$  0.39 (20% EtOAc/hexanes). mp 159.5-160.5 °C.  $^1\text{H}$  NMR (500 MHz)  $\delta$  5.30 (m, 1), 4.90 (dd, 1,  $J = 10.0, 3.16$ ), 4.86 (dd, 1,  $J = 10.0, 2.85$ ), 4.77 (m, 1), 3.47 (sept, 1,  $J = 4.80$ ), 2.28-2.16 (m, 2), 2.03 (m, 1), 1.85-0.8 (m, 15), 1.05 (s, 3), 1.01 (s, 3), 0.88 (s, 9), 0.04 (s, 3).  $^{13}\text{C}\{^1\text{H}\}$  NMR (100 MHz)  $\delta$  202.6, 141.7, 120.6, 116.7, 79.2, 74.1, 72.5, 52.8, 50.3, 43.6, 42.8, 37.3, 36.7, 36.2, 35.0, 32.0, 31.8, 31.3, 25.9, 20.7, 19.4, 19.4, 18.2, -4.60. IR (thin film) 3599, 3446, 1958, 1602.  $[\alpha]_D +1.538$  ( $c = 0.0013$ ,  $\text{CHCl}_3$ ).

**3 $\beta$ -(*t*-butyldimethylsilyloxy)-16,17-secopregn-5en-20-yn-16 $\alpha$ -al (**11b**).**

Triflate **5b** (50 mg, 0.087 mol) was dissolved in THF (450  $\mu\text{L}$ ) and degassed by passing Ar through for 5 min. To this was added  $\text{Pd}(\text{OAc})_2$  (2.2 mg, 0.01 mmol) and  $\text{PPh}_3$  (5.2 mg, 0.02 mmol) and stirred until the solution becomes yellow and cloudy

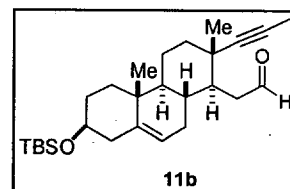

(~5 min).  $\text{Bu}_3\text{SnH}$  (24  $\mu\text{L}$ , 26 mg, 0.09 mmol) was then added dropwise and stirring

was continued for 5 min. The solution was diluted with  $\text{Et}_2\text{O}$  (10 mL) and concentrated. The crude  $^1\text{H}$  NMR

showed **5b** and the aldehyde, with trace of  $\alpha$ -allenic alcohol **7b** ( $\alpha$ -isomer). Flash chromatography (1%

EtOAc/hexanes, 1%  $\text{NEt}_3$ ) of the crude products on deactivated silica gave aldehyde **11b** (24 mg, 0.043 mmol, 49%)

and **7b** ( $\alpha$ -isomer) (8 mg, 0.018 mmol, 21 %). The spectral data of  $\alpha$ -allenic alcohol was identical to those obtained previously. Attempts to further purify the aldehyde **11b** for microanalysis was unsuccessful.

Aldehyde **11b**:  $R_f$  0.36 (10% EtOAc/hexanes).  $^1\text{H}$  NMR (400 MHz)  $\delta$  9.77 (dd, 1,  $J = 1.90, 2.70$ ), 5.28 (br s, 1), 5.24 (m, 1), 3.45 (sept, 1,  $J = 5.02$ ), 2.68 (ddd, 1,  $J = 1.75, 4.59, 16.8$ ), 2.32 (ddd, 1,  $J = 2.88, 6.41, 16.8$ ), 2.25-0.8 (m, 17), 1.06 (s, 3), 0.936 (s, 3), 0.866 (s, 9), 0.0361 (s, 6).  $^{13}\text{C}\{^1\text{H}\}$  NMR (100 MHz)  $\delta$  202.9 (CH), 141.1 (C), 120.2 (CH), 87.6 (C), 76.8 (C), 72.4 (CH), 49.2 (CH), 46.7 ( $\text{CH}_2$ ), 42.4 ( $\text{CH}_2$ ), 39.5 ( $\text{CH}_2$ ), 37.0 ( $\text{CH}_2$ ), 36.8 (C), 35.0 (C), 33.2 (CH), 32.3 ( $\text{CH}_2$ ), 32.0 ( $\text{CH}_2$ ), 31.9 (C), 25.9 ( $\text{CH}_3$ ), 1.8 ( $\text{CH}_2$ ), 19.5 ( $\text{CH}_3$ ), 19.3 ( $\text{CH}_3$ ), 18.2 (C), 3.4 ( $\text{CH}_3$ ), -4.6 ( $\text{CH}_3$ ). IR (thin film) 1718, 1672.
